# Supplementary material for: Kennedy and Lincoln: Medical and Ballistic Comparisons of their Assassinations
Source: Springer Nature journal article supplement (doi:10.1186/1472-6947-14-17), 1981-09-01
Supplement: 12911_2013_883_MOESM1_ESM.pdf [file 12911_2013_883_MOESM1_ESM.pdf]

## Discrepancies

The following table summarizes all the ICD10/MeSH couples with discordant icons that were analyzed. MeSH descriptor and ICD10 code on the same line share the same UMLS CUI but do not have the same VCM icon.

The discrepancy type was assessed by both aligners (GK and NG), on consensus.

The corresponding icons can be seen in the Health Terminology/Ontology Portal ([www.hetop.eu](http://www.hetop.eu))

| MeSH descriptor                | ICD10 code                                         | Discrepancy type |
|--------------------------------|----------------------------------------------------|------------------|
| Intestinal diseases, parasitic | Unspecified intestinal parasitism                  | Reviewer error   |
| Radiodermatitis                | Radiodermatitis                                    | Reviewer error   |
| arthritis, infectious          | Pyogenic arthritis                                 | UMLS error       |
| Intestinal diseases, parasitic | Intestinal parasitism, unspecified                 | Reviewer error   |
| Spinal cord neoplasms          | Spinal cord                                        | UMLS error       |
| Radiodermatitis                | Radiodermatitis, unspecified                       | Reviewer error   |
| arthritis, infectious          | Pyogenic arthritis, unspecified                    | UMLS error       |
| Myositis                       | Infective myositis                                 | UMLS error       |
| Urinary tract infections       | Urinary tract infection, site not specified        | Reviewer error   |
| Abortion, threatened           | Threatened abortion                                | Reviewer error   |
| Lactation disorders            | Hypogalactia                                       | UMLS error       |
| Birth injuries                 | Birth injury, unspecified                          | VCM error        |
| Skin abnormalities             | Congenital malformation of integument, unspecified | Reviewer error   |
| Alcohol drinking               | Alcohol use                                        | UMLS error       |
| Heart arrest                   | Cardiac arrest                                     | Reviewer error   |
| Heart arrest                   | Cardiac arrest, unspecified                        | Reviewer error   |
| Urologic diseases              | Disorder of urinary system, unspecified            | Reviewer error   |
| Optic nerve neoplasms          | Optic nerve                                        | Reviewer error   |
| Rheumatic diseases             | Rheumatism, unspecified                            | Reviewer error   |
| Endometriosis                  | Endometriosis                                      | Reviewer error   |
| Cellulitis                     | Cellulitis, unspecified                            | Reviewer error   |
| Facial nerve diseases          | Geniculate ganglionitis                            | UMLS error       |
| Colitis, ulcerative            | Ulcerative colitis                                 | UMLS error       |
| Sex offenses                   | Sexual abuse                                       | UMLS error       |
| Varicocele                     | Scrotal varices                                    | VCM error        |
| Pemphigoid, bullous            | Bullous pemphigoid                                 | Reviewer error   |
| Infectious mononucleosis       | Infectious mononucleosis                           | VCM error        |
| Erythema                       | Erythematous condition, unspecified                | Reviewer error   |
| Ocular motility disorders      | Internuclear ophthalmoplegia                       | UMLS error       |
| Craniocerebral trauma          | Superficial injury of head, part unspecified       | UMLS error       |
| Reflex, abnormal               | Abnormal reflex                                    | Reviewer error   |
| Craniocerebral trauma          | Unspecified injury of head                         | Reviewer error   |
| Staphylococcal food poisoning  | Foodborne staphylococcal intoxication              | Reviewer error   |
| Dermatitis, atopic             | Atopic dermatitis, unspecified                     | Reviewer error   |
| Hemothorax                     | Haemothorax                                        | Reviewer error   |
