# Supplementary material for: Kennedy and Lincoln: Medical and Ballistic Comparisons of their Assassinations
Source: Springer Nature journal article supplement (doi:10.1186/1472-6947-14-17), 1981-09-01
Supplement: 12911_2013_883_MOESM2_ESM.pdf [file 12911_2013_883_MOESM2_ESM.pdf]

### Central colors

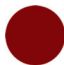

Medical history

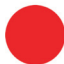

Current condition

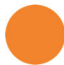

Risk

### Top right colors

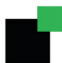

Treatment

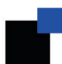

Monitoring

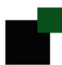

Treatment history

### Top right pictogram

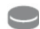

Oral drug

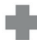

Drug

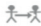

Transplant

### Central pictogram

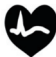

Heart rate

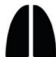

Lung

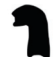

Nose and throat

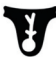

Pregnancy

### Shape

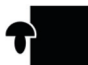

Fungal infection

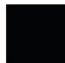

Pathological state

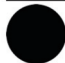

Physiological state

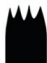

Inflammation
